# Supplementary material for: Pyrolysis study of a waste plastic mixture through different kinetic models using isothermal and nonisothermal mechanism
Source: Royal Society of Chemistry journal article supplement (doi:10.1039/d4ra04957h), 2024-01-01
Supplement: d4ra04957h1.pdf [file d4ra04957h1.pdf]

Appendix (A.1) Fuel types and hydrocarbons chains

| Fuel types | Hydrocarbons    | Probable Chemical structure                                                                                                                                                                                                                                                                                                                                                                                  |
|------------|-----------------|--------------------------------------------------------------------------------------------------------------------------------------------------------------------------------------------------------------------------------------------------------------------------------------------------------------------------------------------------------------------------------------------------------------|
| WPM oil    | C <sub>4</sub>  | 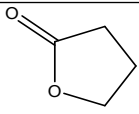<br>2-Butyrolactone                                                                                                                                                                                                                                                                                                         |
|            | C <sub>5</sub>  | <br>Ethyl propionate , Propyl acetate , 2-Cyclopenten-1-one ,<br><br>2(3H)-Furanone, dihydro-5-methyl-                                                                                                                                    |
|            | C <sub>6</sub>  | <br>2-Cyclopenten-1-one, 2-methyl- , 5-Methyltetrahydrofuran-2-methanol ,<br>2-Butanone, 3,4-epoxy-3-ethyl- , 2-Cyclohexen-1-one ,<br>2-Cyclopenten-1-one, 3-methyl- , Hexanoic acid , Phenol ,<br><br>2(3H)-Furanone, 5-ethylidihydro |
|            | C <sub>7</sub>  | <br>3,6-Heptanedione , 2,3-Dimethyl-2-cyclopenten-1-one ,                                                                                                                                                                                                                                                                |
|            | C <sub>10</sub> | <br>1-Decene , Decane ,                                                                                                                                                                                                                                                                                                  |
|            | C <sub>11</sub> | <br>1-Undecene , Undecane ,                                                                                                                                                                                                                                                                                              |
|            | C <sub>12</sub> | <br>1-Dodecene , Dodecane ,                                                                                                                                                                                                                                                                                               |
